# Supplementary material
Source: PubMed Central journal article supplement (PMC6483377)
Supplement: NIHMS1516512-supplement-1.pdf [file NIHMS1516512-supplement-1.pdf]

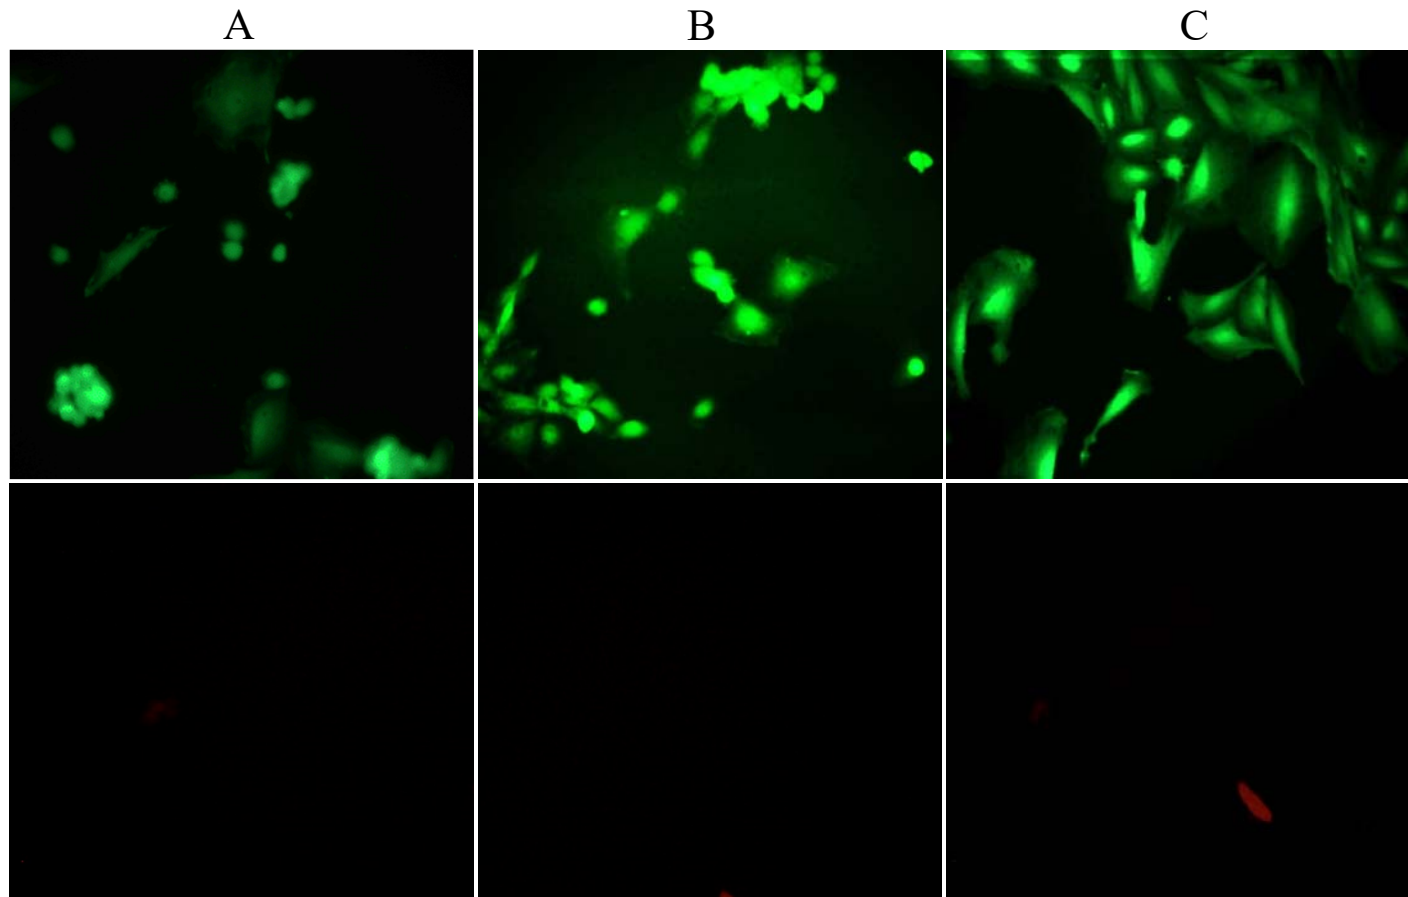

S-Figure 1. Representative images showing cell viability assay results on three types of materials: (A) Tissue culture plate; (B) PCL/gelatin coaxial fibre; (C) PCL fibre. arterial endothelial cells were stained with Live/Dead assay kit and examined under fluorescent microscopy. For each material, the top image illustrates live cells with green fluorescence and the bottom image illustrates dead cells with red fluorescence.

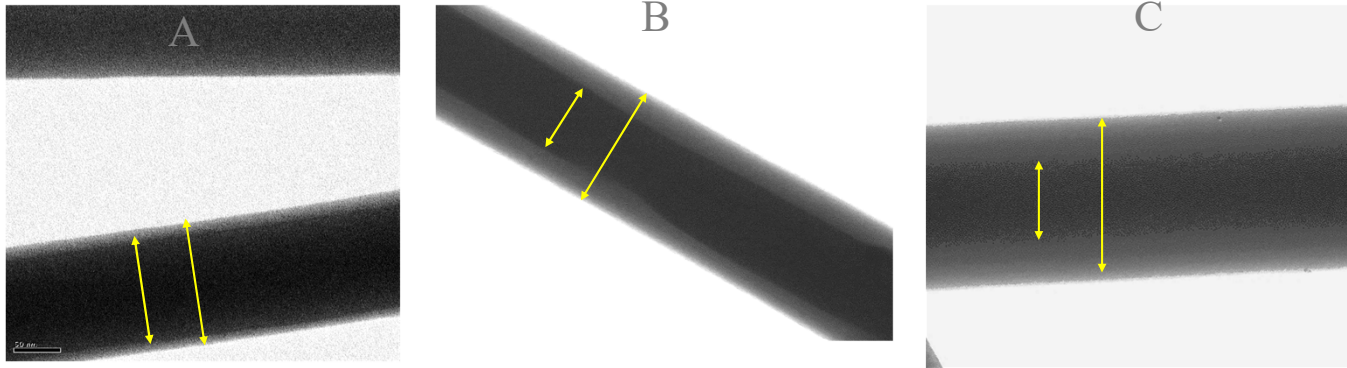

S-Figure 2. Transmission electron microscopy (TEM) images of vascular grafts consisting of coaxial PU-gelatin fibers with the PU-to-gelatin ratio of 1:5 (A), 2:10 (B) and 2:8 (C). The arrows illustrate the core and sheath boundaries.

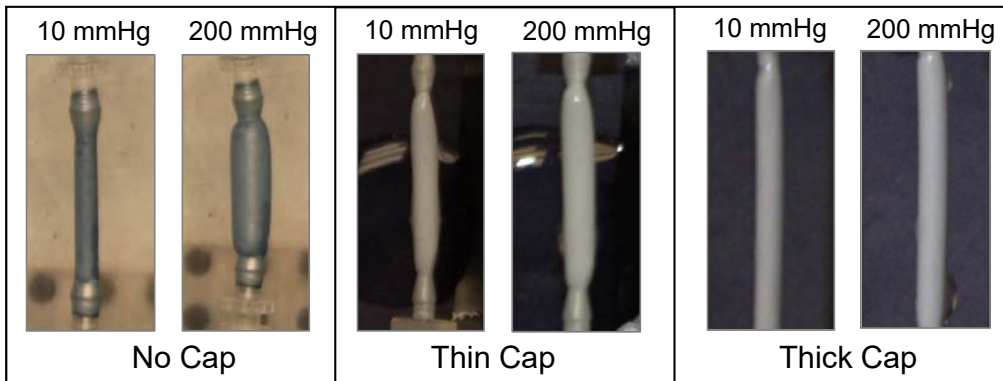

S-Figure 3. Representative images in the bottom panel illustrate the difference in the graft compliance within the physiological pressure range.

|                                   | PU:gelatin<br>(1:5) | PU:gelatin<br>(2:10) | PU:gelatin<br>(2:8) |
|-----------------------------------|---------------------|----------------------|---------------------|
| Average fiber diameter<br>(nm)    | 210±70              | 410±110              | 390±80              |
| Average burst pressure<br>(mmHg)  | 540±140             | 384±160              | 426±190             |
| Average compliance<br>(%/100mmHg) | 7.9±1.8             | 32±8.6               | 36±7.8              |

S-Table 1. Physical and mechanical properties of vascular grafts made of coaxial PU-gelatin fibers
