# Supplementary material
Source: PubMed Central journal article supplement (PMC6483377)
Supplement: NIHMS1516512-supplement-2.pdf [file NIHMS1516512-supplement-2.pdf]

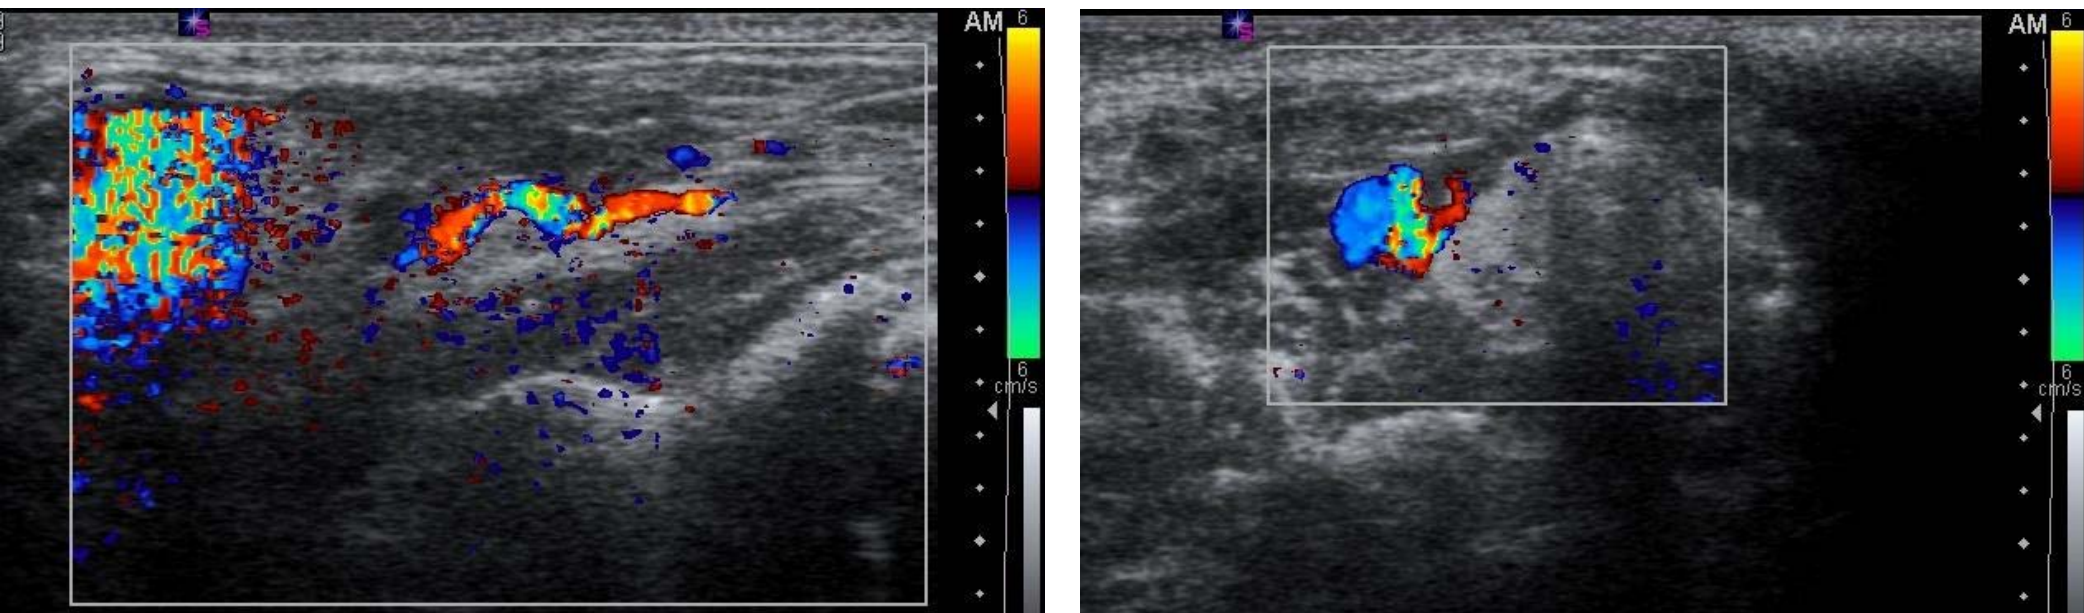

S-Figure 4. Representative ultrasonic doppler images, showing reperfusion after implantation. The left and right panels show the flow velocity profile in the sagittal and transverse planes of the graft, respectively
